1 **'Discovery Report'**

2

3 **A functional bacterial-derived restriction modification system in the**  
4 **mitochondrion of a heterotrophic protist**

5

6 David S. Milner<sup>a,1</sup>, Jeremy G. Wideman<sup>b,c,1,\*</sup>, Courtney W. Stairs<sup>d</sup>, Cory D. Dunn<sup>e</sup> and Thomas  
7 A. Richards<sup>a,\*</sup>

8 <sup>a</sup>Department of Zoology, University of Oxford, 11a Mansfield Road, Oxford OX1 3SZ, UK

9 <sup>b</sup>Biodesign Center for Mechanisms of Evolution, School of Life Sciences, Arizona State  
10 University, Tempe, AZ, 85287, USA.

11 <sup>c</sup>Wissenschaftskolleg zu Berlin, Wallotstraße 19, 14193, Berlin, Germany.

12 <sup>d</sup>Department of Biology, Lund University, Sölvegatan 35, 223 62 Lund, Sweden

13 <sup>e</sup>Institute of Biotechnology, Helsinki Institute of Life Science, University of Helsinki, Helsinki,  
14 00014, Finland

15 <sup>1</sup>These authors contributed equally to this work.

16

17 \*Corresponding authors:

18 **Thomas A. Richards**, Department of Zoology, University of Oxford, 11a Mansfield Road,  
19 Oxford OX1 3SZ, United Kingdom. E-mail: [thomas.richards@zoo.ox.ac.uk](mailto:thomas.richards@zoo.ox.ac.uk)

20 **Jeremy G. Wideman**, Biodesign Center for Mechanisms of Evolution, School of Life Sciences,  
21 Arizona State University, Tempe, AZ, 85287, USA. Email: [jeremy.wideman@asu.edu](mailto:jeremy.wideman@asu.edu)

22 **Short title: A functional mitochondrial-encoded restriction modification system in a**  
23 **heterotrophic protist.**

24

25

26 **Abstract**

27 The overarching trend in mitochondrial evolution is functional streamlining coupled with gene  
28 loss; therefore, gene acquisition by mitochondria is considered to be exceedingly rare. Selfish  
29 elements in the form of self-splicing introns occur in many organellar genomes, but the wider  
30 diversity of selfish elements, and how they persist in organellar genomes, has not been  
31 explored. In the mitochondrial genome of a marine heterotrophic katablepharid protist, we  
32 identify a functional type II restriction modification system originating from a horizontal gene  
33 transfer event involving bacteria related to flavobacteria. This restriction modification system  
34 consists of an HpaII-like endonuclease and a cognate cytosine methyltransferase. We  
35 demonstrate that these proteins are functional by heterologous expression in both bacterial  
36 and eukaryotic cells. These results suggest that toxin-antitoxin selfish elements, such as  
37 restriction modification systems, could be co-opted by eukaryotic genomes to drive  
38 uniparental organellar inheritance.

39

## 40 Introduction

41 Endosymbiosis, the localization and functional integration of one cell within another [1–3],  
42 can lead to the evolution of specialized organellar compartments responsible for a range of  
43 cellular and biochemical functions [4]. Mitochondria and plastids originate from  
44 endosymbiotic events, and typically retain vestigial genomes of bacterial ancestry [5,6]. While  
45 sequencing initiatives have demonstrated that mitochondrial gene content can vary  
46 extensively, their evolution in every eukaryotic lineage is typified by both functional and  
47 genomic reduction [7,8]. Rare gene replacements and novel gene acquisitions into  
48 mitochondrial genomes have been identified, particularly involving plant-to-plant gene  
49 transfers [9–12], with plants also susceptible to the transfer of entire organellar genomes [13–  
50 15]. In addition, mitochondrial group I and II self-splicing introns demonstrate a pattern of  
51 mosaic distribution consistent with multiple recent gene transfer and loss events [16,17].  
52 Chloroplasts generally exhibit the same reductive evolutionary trends [18]; and although  
53 horizontal gene transfer (HGT) of a bacterial operon into the chloroplast genome of  
54 eustigmatophyte algae (Ochrophyta), including *Monodopsis* and *Vischeria*, has been  
55 reported, the functional relevance of this acquisition is not yet clear [19]. While novel  
56 functional genes have entered chloroplast genomes, and replacement genes can find their  
57 way into mitochondrial DNA (mtDNA), no gain-of-function transfers into the mitochondrial  
58 genome have, to our knowledge, been reported previously.

59 Truly ‘selfish’ genetic elements serve no function except to replicate themselves [20],  
60 even at the cost of host fitness. However, some horizontally transferred selfish elements have  
61 been co-opted to perform critical functions in host cells [21]. For example, type II restriction  
62 modification (RM) systems can provide host cells with protection from invasion by viruses,  
63 plasmids, or other sources of foreign DNA [22]. RM selfish elements work by the coordinated  
64 regulation of two enzymes that behave as a type IV toxin-antitoxin system [23]; the restriction  
65 endonuclease acts as a ‘toxin’ by cutting DNA at specific recognition sequence motifs, while  
66 a methyltransferase acts as an ‘anti-toxin’ by modifying nucleotides at the same recognition  
67 sequence, thereby protecting the DNA from cleavage by the endonuclease. If found within an  
68 organellar genome, a functional RM system could simply act to protect the genome from  
69 invasion by viruses/phages, plasmids, or other sources of foreign DNA. However, RM systems

70 in organelles could also act as a strong ‘gene drive’, ensuring that a single mitochondrial  
71 haplotype would quickly sweep to fixation in a sexual population via mitochondrial fusion  
72 events.

73 We have recently explored the content of diverse protist mitochondrial genomes  
74 using targeted culture-independent single cell approaches [24]. This process allowed us to  
75 recover the first complete mitochondrial genomes from katablepharid protists. Here, we  
76 describe the identification and characterization of four open reading frames (ORFs)  
77 comprising two type II RM selfish elements within katablepharid mtDNA. To our knowledge,  
78 we present the first example of a type II RM selfish element within any eukaryotic genome  
79 (nuclear or organellar), that likely derives from an HGT event into the mitochondrial genome.  
80 We report the phylogenetic ancestry of these genes and assess the activity of the encoded  
81 enzymes by heterologous expression in *Escherichia coli* and *Saccharomyces cerevisiae*. We  
82 suggest that these mitochondrial-encoded proteins may constitute a hitherto undescribed  
83 system controlling patterns of organelle inheritance.

## 84 **Results**

### 85 **Identification of unique restriction-modification selfish elements in katablepharid** 86 **mitochondrial genomes**

87 Our recent initiative to assess mitochondrial genome content using environmentally sampled  
88 protistan single-cell amplified genome (SAG) sequencing resulted in the complete  
89 mitochondrial sequence of multiple marine heterotrophic katablepharid protists [24]. The  
90 contemporary publication of the complete *Leucocryptos marina* mitochondrial genome  
91 confirmed the identity of the single-cell amplified genome (SAG)-derived mitochondrial DNAs  
92 as katablepharids [25]. The genomes from the SAG-generated mtDNA and *Leucocryptos*  
93 mtDNA were identical in their repertoires of canonical mitochondrial genes including tRNA  
94 genes (**Fig. 1a**). They shared synteny throughout the majority of the genome, including near  
95 identical intron locations in *rnl*, *cob*, and *cox1* (grey in **Fig. 1a**), and retained three unassigned  
96 ORFs at identical genomic locations (orange in **Fig. 1a**). The regions lacking synteny between  
97 the complete genomes encode *atp9*, *rns*, the vast majority of *tRNAs*, as well as a variety of  
98 unassigned ORFs. Of these eight unassigned ORFs in this region of the SAG-derived  
99 katablepharid mitochondrial genome, three had homologues in *L. marina* (orange in **Fig. 1a**),

100 but five did not retrieve *L. marina* proteins as top hits using BLAST searches (red in **Fig. 1a**).  
101 One of these was a highly divergent GIY-YIG homing endonuclease, two were identified as  
102 restriction enzymes, and two were identified as cytosine methyltransferases (CMs) (**Fig. 1b**).  
103 The restriction enzymes and CMs comprised two tandemly-encoded type II Restriction-  
104 Modification (RM) selfish genetic elements each consisting of a restriction endonuclease and  
105 a cognate CM. Specifically, the two katablepharid RMs were identified to be composed of a  
106 HpaII restriction endonuclease (Kat-HpaII) and its cognate cytosine methyltransferase (Kat-  
107 HpaII-CM), and a MthI/Restriction endonuclease type II (Kat-MthI) with its cognate  
108 cytosine-C5 methyltransferase (Kat-MthI-CM) (**Fig. 1b**). The Kat-HpaII RM system is flanked  
109 by near-identical (152/155 bp) sequences that may reflect the recent integration of this selfish  
110 element (shown in orange in **Fig. 1b**) into the katablepharid mtDNA.

111 BLASTP analysis of the putative methyltransferases against the REBASE database  
112 (<http://rebase.neb.com>; accessed January 2021) indicated that Kat-HpaII-CM is likely specific  
113 to a CCGG DNA recognition sequence, with an *Algibacter* methyltransferase (accession:  
114 ALJ03853.1) as the top hit (59% identity). Furthermore, BLASTP analysis suggested that the  
115 Kat-MthI-CM was likely specific to a GATC DNA recognition sequence, and the top hit was a  
116 methyltransferase from *Arenitalea lutea* (genome accession: ALIH01000012.1, 74% identity).  
117 Analysis of the putative endonucleases also suggested that Kat-HpaII was specific for a CCGG  
118 DNA recognition sequence, with an *Aggregatibacter* endonuclease (accession: RDE88890.1)  
119 as the top BLASTP hit (36% identity), and that the Kat-MthI endonuclease may be specific for  
120 GATC, recovering as the top BLASTP hit a DNA mismatch repair protein from *Mangrovimonas*  
121 (accession: KFB02001.1, 27% identity). The 2240 bp region encoding the Kat-HpaII/Kat-HpaII-  
122 CM RM system lacks any CCGG motifs, which are expected to occur by chance once every 752  
123 bp in the katablepharid mitochondrion, based on a GC content of 38% for this organelle  
124 genome. Taken together, our analysis predicts that the gene products within each  
125 katablepharid RM pair target the same recognition sequences.

126 To confirm that all identified regions were not the result of contamination or genome  
127 assembly artifacts, we re-amplified the corresponding region of the mitochondrion from the  
128 SAG DNA samples, confirming the four-gene architecture of the selfish element identified was  
129 present in two samples ('katablepharid 1 (i.e. 'K1')' and 'katablepharid 4' (i.e. 'K4')) (**Fig. 1b**),

130 and that the genes are adjacent to the katablepharid mitochondrial *atp9* and *rns* genes. This  
131 PCR analysis also confirmed the existence of a reduced variant (in ‘katablepharid 3’), which  
132 consists of only the N-terminus region of the MutH-cytosine methyltransferase gene (**Fig. 1b**).

133 Next, we conducted three separate, targeted PCRs using environmental DNA samples  
134 recovered from parallel marine water samples collected on the same date, and from the same  
135 site, as those which contained the individual cells sorted for genome sequencing [24]. These  
136 analyses further confirmed that the selfish elements were found adjacent to mitochondrial  
137 genes, and that the products were not an artefact of multiple displacement amplification as  
138 part of the single-cell sequencing pipeline. We also identified an additional contig possessing  
139 an intermediate reduced form of the selfish element gene architecture, which contained only  
140 the MutH-CM gene (**Fig. 1b**). In total, the integration of RM systems into mitochondrial  
141 genomes was independently confirmed five times. Collectively, these results indicate that RM  
142 selfish genetic elements have been incorporated into mtDNAs, and have been subjected to  
143 rapid evolutionary change, including gene loss/ORF-reduction.

144 To explore if the identified selfish element genes are expressed, we interrogated a  
145 collection of marine meta-transcriptome data publicly available at the Ocean Gene Atlas  
146 (OGA, available at <http://tara-oceans.mio.osupytheas.fr/ocean-gene-atlas/>). We identified a  
147 number of eukaryotic transcripts from geographically diverse marine sampling sites with  
148 strong nucleotide identity to the *kat-Hpall*, *kat-Hpall-CM*, and *kat-MutH-CM* genes  
149 (**Supplementary File S1**), demonstrating that this selfish genetic element is expressed from  
150 the katablepharid mitochondrial genome. Regions identified in the MATOU\_v1\_metaT  
151 transcriptome database with >95% identity are shown in **Fig. 1b**. Interestingly, two of the OGA  
152 RNAseq derived contigs that showed >99% nucleotide identity to the Kat-Hpall mitochondrial  
153 gene were composed of sequence reads sampled from multiple sites in the Pacific, Southern  
154 Atlantic, and Indian Oceans, and the Mediterranean Sea. These samples included both  
155 ‘surface’ and ‘deep chlorophyll maximum’ samples. These results suggest that the Kat-Hpall  
156 endonuclease is transcriptionally active across a wide range of ocean environments.  
157 Furthermore, the OGA transcript sequences included one contig that traverses the *trnW* gene  
158 and the repetitive flanking sequence upstream of Kat-Hpall-CM/Kat-MutH-CM gene cluster,  
159 indicative of mitochondrial co-transcription.

## 160 **Katablepharid mitochondrial RM system has flavobacterial ancestry**

161 To explore the phylogenetic ancestry of the selfish genetic element we conducted  
162 phylogenetic analysis using Bayesian and maximum likelihood approaches, with a focus upon  
163 the complete Kat-HpaII-CM and Kat-HpaII found in the K4 assembly [24], as Kat-MutH-CM and  
164 Kat-MutH were found to have no detectable function (discussed below). The phylogeny of the  
165 restriction endonuclease showed limited bootstrap support, with the mitochondrial genes  
166 branching with weak bootstrap support within the flavobacteria (**Fig. S1a**). In contrast,  
167 phylogenetic analysis of Kat-HpaII-CM (**Fig. S1b**) and the concatenated alignment of both Kat-  
168 HpaII and Kat-HpaII-CM demonstrated strong bootstrap support (**Fig. 2a**) for the  
169 mitochondrial selfish genetic element branching within a clade of flavobacteria. There is  
170 currently no evidence that flavobacteria, or genetic material derived from the flavobacteria,  
171 played a role in the origin of the eukaryotes or the mitochondrial organelle [26,27].  
172 Furthermore, the katablepharid SAG assemblies contained no obvious contaminating  
173 flavobacterial-like sequences (**Fig. S2**). As such, we conclude that the selfish genetic element  
174 is a recent transfer to the mitochondrial genome from a donor species that branches within,  
175 or close to, the flavobacteria. Our phylogenetic analysis demonstrated that the selfish genetic  
176 element represented a relatively extended branch in the phylogeny (**Fig. 2a**), suggesting  
177 evolutionary scenarios consistent with invasion of the mtDNA genome, such as population  
178 bottlenecks, positive selection, or relaxed selection.

179 To further explore the nature of sequence evolution associated with this HGT event,  
180 we calculated the codon usage frequencies of the Kat4-HpaII RM, the conserved protein-  
181 coding gene repertoire of the Kat4 mtDNA, and the *Algibacter*-HpaII RM. Using Fisher Exact  
182 tests, we demonstrated that codon usage was significantly different for 14 amino acids when  
183 comparing the Kat4 complement of unambiguously ancestral Kat4 mitochondrial proteins and  
184 the *Algibacter*-HpaII RM. In contrast, the Kat4-HpaII RM represents an intermediate, with 6  
185 amino acids with codon usage differing from the Kat4 mtDNA [again sampling all  
186 unambiguously ancestral Kat4 mitochondrial proteins], and 7 amino acids with codon usage  
187 differing from that of *Algibacter*-HpaII RM (**Fig. 2b**; see **Supplementary File S3** for raw data).  
188 These data are consistent with the hypothesis that the Kat4-HpaII RM is in the process of  
189 domestication towards the sequence characteristics of the host mtDNA. Such changes may

190 also be, in part, a driver and/or consequence of the accelerated evolutionary rate indicated  
191 by the relatively long branch the katablepharid selfish element forms in the phylogenetic trees  
192 (**Fig. 2a**)

### 193 **Confirmation of a functional mitochondrial katablepharid methyltransferase**

194 To explore the function of the selfish element and to test if it has undergone  
195 pseudogenization, we cloned the Kat-HpaII-CM and its closest bacterial homologue in terms  
196 of sequence identity, *Algibacter* HpaII-CM (Alg-HpaII-CM), into plasmid pACYC184 and  
197 expressed them in *E. coli* Top10 cells. This *E. coli* strain does not contain any  
198 methyltransferases that target the putative HpaII-CM recognition sequence (CCGG), but  
199 instead expresses Dcm methylase, which methylates the second cytosine residue in CCWGG  
200 [28], and Dam methylase, which methylates adenine residues in the sequence GATC [29]. The  
201 HpaII-CM-expressing *E. coli* Top10 strains were cultured for 16 h alongside a control strain  
202 harbouring an empty plasmid. These plasmids were then extracted, linearized and subject to  
203 bisulfite conversion, a process that converts cytosine nucleotides to uracil but does not alter  
204 methylated 5-methylcytosines (5-mC). A 299 bp region of each plasmid was PCR amplified  
205 and sequenced. In the plasmid from the control strain, all CCGG sites appeared as TTGG in  
206 sequencing chromatograms, whereas plasmids sequenced from strains expressing Kat-HpaII-  
207 CM or Alg-HpaII-CM contained TCGG sites (**Fig. 3a**), demonstrating the ability of Kat-HpaII-CM  
208 to methylate CCGG sequences at the second cytosine base.

209 To confirm Kat-HpaII-CM function, we transformed the plasmid expressing this  
210 katablepharid sequence into *E. coli* strain DH5 $\alpha$ , harbouring the C<sup>me</sup>CGG-cutting enzyme  
211 McrA [30], and into the *mcrA*- *E. coli* Top10 strain. Comparisons of transformation efficiency  
212 confirmed that the katablepharid methyltransferase is toxic in an *E. coli* DH5 $\alpha$  background  
213 (**Fig. 3b**), further demonstrating that Kat-HpaII-CM encodes a functional enzyme which  
214 methylates CCGG sites.

215 Next, we also performed bisulfite conversion and sequencing experiments using Kat-  
216 MutH-CM, targeting an alternative 233 bp region of the plasmid to enable detection of  
217 potential methylation at GATC sites. However, we found no evidence of any methylation at  
218 GATC, or other sites, by Kat-MutH-CM, suggesting that this enzyme may have lost its GATC



219 specific catalytic activity, requires additional factors for its function, or has gained an  
220 alternative function.

### 221 **Confirmation of a functional mitochondrial katablepharid endonuclease**

222 To explore the function of the candidate endonucleases, we cloned the putative *Algibacter*  
223 HpaII endonuclease (Alg-HpaII), the katablepharid MutH-like endonuclease (Kat-MutH), and  
224 Kat-HpaII into a pBAD expression vector, transformed these plasmids into *E. coli*, and  
225 compared culture growth for each resulting strain. The strain expressing Kat-MutH showed  
226 no evidence of toxicity, demonstrating a similar growth dynamic to the vector-only *E. coli*  
227 strain (**Fig. S3**), and the functions of Kat-MutH-CM and Kat-MutH were not pursued further.  
228 In contrast, cultures of strains expressing the Kat-HpaII and Alg-HpaII grew slowly, consistent  
229 with these genes encoding functional endonucleases that constitute a *bona fide* 'toxin' (**Fig.**  
230 **3c**). The katablepharid HpaII showed a greater potency during these experiments when  
231 compared to the *Algibacter* HpaII. In order to explore if the Kat-HpaII and Kat-HpaII-CM  
232 function as a toxin/anti-toxin pair, we co-expressed these two proteins. This demonstrated  
233 that Kat-HpaII-CM was able to partially reverse the effects of Kat-HpaII expression in *E. coli*  
234 (**Fig. 3d**). Subsequent experiments increasing the expression of the Kat-HpaII enzyme by  
235 removal of an additional ATG at the 5' of the sequence led to this rescue being perturbed (**Fig.**  
236 **S4**), suggesting that differences in the relative expression of the toxin/antitoxin can determine  
237 the degree of toxicity.

### 238 **Targeting of HpaII-CM and HpaII to yeast mitochondria confirms methyltransferase and** 239 **endonuclease activities**

240 To further explore the likely roles of Kat-HpaII-CM and Kat-HpaII in katablepharid  
241 mitochondria, we targeted each protein to the mitochondria of *S. cerevisiae* cells using an  
242 amino-terminal Su9 mitochondrial targeting sequence (MTS) from *Neurospora crassa* [31].  
243 Constructs also contained a carboxyl-terminal GFP tag to allow confirmation of mitochondrial  
244 localization, and proteins were controlled by a galactose-inducible promoter to allow  
245 temporal induction of gene expression. Following induction of su9(MTS)-Kat-HpaII-CM-GFP,  
246 we sequenced a region of the mitochondrial *COX1* gene following bisulfite conversion. As seen  
247 following heterologous expression in *E. coli*, CCGG sites of mtDNA were methylated,  
248 indicating that Kat-HpaII-CM could function in the context of a mitochondrial matrix (**Fig. 4a**).

249 We also sequenced this region of the *COX1* gene from a *S. cerevisiae* isolate lacking the  
250 su9(MTS)-Kat-HpaII-CM-GFP plasmid and demonstrated that these residues are not  
251 methylated in wild-type cultures. We assessed whether su9(MTS)-Kat-HpaII-CM-GFP would  
252 be recruited to mtDNA by staining mitochondrial nucleoids with DAPI [32]. This demonstrated  
253 that the katablepharid methyltransferase co-localised with punctate DAPI foci (**Fig. 4b**).

254 When su9(MTS)-Kat-HpaII-GFP was targeted to mitochondria, this protein was also  
255 found in puncta, yet the DAPI appeared absent, indicating that the mtDNA has likely been  
256 degraded (**Fig. 4b**). This ability of Kat-HpaII to damage mtDNA was suggested by an increase  
257 in the formation of petite colonies after su9(MTS)-Kat-HpaII-GFP induction (**Fig. 4c**). Taken  
258 together, our results indicate that the Kat-HpaII-CM and Kat-HpaII are able to function within  
259 mitochondria to methylate and degrade mitochondrial DNA.

## 260 Discussion

261 Here, we have revealed the integration of a functional type II RM system into the mtDNA of  
262 a katablepharid – the first known instance detected within a eukaryotic genome. We confirm  
263 that Kat-HpaII and Kat-HpaII-CM are functional when expressed in both prokaryotic and  
264 eukaryotic cells, and we provide data demonstrating a toxin/antitoxin functional relationship  
265 between these two proteins. Why would this active RM selfish element reside within a  
266 mitochondrial genome? We suggest several possible evolutionary scenarios. First, the  
267 katablepharid type II RM selfish element could simply represent a recent invasion of no  
268 functional or evolutionary consequence for its katablepharid host. We do see evidence of RM  
269 system degeneration within some of the katablepharid mitochondrial genome sequences  
270 sampled, suggesting that selection for maintenance of this selfish element is patchy, and loss  
271 is tolerated.

272 Second, the Kat-HpaII and Kat-HpaII-CM system may protect the mitochondria from  
273 foreign DNA. In bacteria, RM selfish elements are thought to function as a defence against  
274 foreign unmethylated DNA [33], such as viruses/phages and plasmids, which are also known  
275 to invade mitochondria [34,35]. However, any fitness benefit to cells harbouring these  
276 elements related to this function would be conditional upon regular exposure to foreign  
277 sources of DNA. Consistent with this proposition, we detected evidence of expression of the

278 Kat-Hpall gene from multiple oceanic environments, implicating a wide biogeographic  
279 distribution of active gene transcription.

280 Third, and most intriguing among these possibilities, this RM element may be driving  
281 spread of the host mtDNA within the katablepharid population. Previous studies indicate that  
282 in a sexual population, selfish mitochondrial mutants spread rapidly, whereas asexual  
283 populations are relatively protected from similar patterns of invasions [36–39]. Furthermore,  
284 mitochondrial reticulation and/or fusion is documented in many eukaryotes [40,41]. Thus,  
285 crosses of Kat4-Hpall RM+ and RM- individuals would hypothetically initially result in a mixed  
286 population of mitochondria. After mitochondrial fusion, RM+ mtDNA would lead to digestion  
287 of unprotected RM- mtDNA, leading to selfish element-mediated, uniparental inheritance of  
288 RM+ mtDNA and, potentially, the rapid spread of this mitochondrial haplotype. To further  
289 explore this possibility we searched for genes which putatively encode meiosis components  
290 in our four katablepharid SAGs and identified gene fragments of six meiosis-associated  
291 proteins (MSH5, XRCC3, DMC1, SPO11, Brambleberry and SNF2; see **Supplementary File S2**)  
292 in K2/K4, suggesting that katablepharids, like most eukaryotes, contain meiosis-specific genes  
293 (e.g. SPO11; MSH5 [42]), and may be capable of sexual reproduction, although sex has not  
294 been directly observed in this lineage [43]. However, these SAGs are incomplete and  
295 extremely fragmented [24], and therefore require confirmation with additional data.

296 Uniparental inheritance of cytoplasmic organelles is a consistent trend across diverse  
297 eukaryotic groups and has multiple, independent origins [44]. Therefore, the invasion of  
298 organellar genomes by RM selfish elements may constitute a hitherto unrecognised  
299 mechanism for gene drive that enables differential parental inheritance of mitochondrial  
300 genomes, independent of direct nuclear control. While methylation/nuclease functions may  
301 contribute to the uniparental inheritance of chloroplasts in *Chlamydomonas* [45,46], the  
302 mechanisms in this system are unclear, and the genes responsible have not been reported to  
303 be a consequence of an HGT invasion event. Furthermore, the invasion of selfish genetic  
304 elements, based on toxin-antitoxin function, into organellar genomes has been predicted  
305 [47], although, until now, not identified. This prediction sets out that selfish genetic elements  
306 will take up important roles in inter-organellar genome conflict (i.e. a form of organellar  
307 ‘warfare’) [47]. It is therefore possible, even likely, that the RM system identified here may

308 act as weapon in such warfare, manipulating the inheritance patterns of mitochondrial  
309 genomes in katablepharids.

## 310 **Materials and Methods**

### 311 **Phylogenetic analysis of restriction-modification selfish elements encoded in katablepharid** 312 **mitochondrial genomes**

313 To determine the origins of the katablepharid mitochondrial-encoded RM selfish element we  
314 collected putative homologues from the NCBI *nr* database using katablepharid HpaII (Kat-  
315 HpaII) and HpaII-CM (Kat-HpaII-CM) as queries. The top hits were predominantly from the  
316 Flavobacteriaceae, suggesting that the katablepharid RM originated within this group. To  
317 confirm the phylogenetic origins of the katablepharid RM system, we collected protein  
318 sequences from diverse bacterial phyla that encoded HpaII and HpaII-CM in tandem, then  
319 reconstructed single-gene and concatenated phylogenies. HpaII and HpaII-CM orthologues  
320 were aligned with MUSCLE [48] and manually trimmed using Mesquite v.2.75 [49]. The two-  
321 gene concatenation was performed by hand in Mesquite v.2.75. Phylogenetic tree  
322 reconstructions were performed using MrBayes v.3.2.6 for Bayesian analysis [50] using the  
323 following parameters: prset aamodelpr = fixed (WAG); mcmcngen = 2,000,000; samplefreq =  
324 1000; nchains = 4; startingtree = random; sumt burnin = 250. Splits frequencies were checked  
325 to ensure convergence. Maximum-likelihood bootstrap values (100 pseudoreplicates) were  
326 obtained using RAxML v.8.2.10 [51] under the LG model [52].

### 327 **Analysis of codon usage**

328 Codon usage frequencies of the proteins encoded by the Kat4 and Algibacter HpaII and HpaII-  
329 CM selfish elements, as well as the unambiguously ancestral Kat4 mitochondrial proteins [26],  
330 were determined using the Sequence Manipulation Suite server [53]. Amino acid codon usage  
331 frequencies were compared using a Fisher Exact test in R (version 1.3.1073) [54].

### 332 **Identification of katablepharid-related restriction-modification systems in metagenomic** 333 **databases**

334 All four genes of the two selfish elements were BLASTN searched against the Ocean Gene  
335 Atlas [55] (searched December 2020, tool available at: [http://tara-  
336 oceans.mio.osupytheas.fr/ocean-gene-atlas/](http://tara-oceans.mio.osupytheas.fr/ocean-gene-atlas/)) OM-RGC\_v2\_metaT (prokaryote) and

337 MATOU\_v1\_metaT (eukaryote) transcriptome databases. Only hits of over 100 bp in length  
338 with DNA identity scores in excess of 95% were retained for further analysis (see  
339 **Supplementary File S1**).

#### 340 **Identification of putative meiosis protein encoding genes in katablepharid SAGs**

341 Hidden Markov models (HMMs) corresponding to meiosis-associated proteins [56,57] were  
342 retrieved from Pfam, PNTHR, EGGNOG and TIGR databases via InterPro  
343 (<https://www.ebi.ac.uk/interpro/>; November, 2020); see **Supplementary File S2** for accession  
344 numbers. These HMMs were used as queries against a six-frame translation of the  
345 Katablepharid SAGs (K1: sample 11B\_35C, K2: 11H\_35C, K3: 5F\_35A, K4: 6E\_35B;  
346 [https://figshare.com/articles/dataset/Single\\_Cell\\_Genomic\\_Assemblies/7352966](https://figshare.com/articles/dataset/Single_Cell_Genomic_Assemblies/7352966)) using  
347 hmmsearch with an e-value (-E) cut-off of 0.1, with all other parameters at default. The  
348 nucleotide sequences from resulting hits were used as queries against the non-redundant (*nr*)  
349 database (November, 2020) using BLASTX [58] to allow for intron read-through. If the majority  
350 of the top hits against the *nr* database corresponded to the same meiosis-associated protein,  
351 then the sequence was included in **Supplementary File S2**.

#### 352 **PCR confirmation of katablepharid restriction-modification selfish elements**

353 To validate the presence of the RM system on the katablepharid mitochondrial genome  
354 assembly, and to further assess the katablepharid mitochondrial RM diversity, we conducted  
355 PCR, using a range of templates: i) a katablepharid single-cell amplified genome (SAG) DNA  
356 from Wideman *et al* [24] and ii) DNA extracted from a water sample taken at a depth of 20 m  
357 from the same site, the Monterey Bay Aquarium Research Institute time-series station M2,  
358 and on the same date, as the single-cell isolations [24]. PCR amplifications were performed  
359 using Phusion polymerase (New England Biolabs) and the primers detailed in **Table S1**. Each  
360 25 µl reaction contained 200 nM of each primer, 400 nM dNTPs and 1 ng template DNA.  
361 Cycling conditions were 2 mins at 98°C followed by 30 cycles of 10 s at 98°C, 20 s at 64.3°C, 2-  
362 3 mins at 72°C, and a final extension of 7 mins at 72°C. PCR products were purified (GeneJet  
363 PCR Purification Kit, Thermo Fisher Scientific), adenosine-tailed using GoTaq Flexi DNA  
364 polymerase (Promega), and cloned into pSC-A-amp/kn using a StrataClone PCR Cloning Kit  
365 (Agilent Technologies). Plasmids were then Sanger sequenced using T7/T3 primers or the

366 original PCR primers (MWG Eurofins), with additional internal sequencing reactions  
367 performed when necessary.

### 368 **Plasmid construction**

369 Sequences were codon optimised for *E. coli* or *S. cerevisiae* expression and synthesised *de*  
370 *novo* (Synbio Tech, NJ). For *E. coli* expression, putative methyltransferases were cloned into  
371 the BamHI/Sall sites of the low copy vector pACYC184 (New England Biolabs) with an  
372 upstream Shine-Dalgarno consensus sequence (5'-AGGAGG-3'), and putative endonucleases  
373 were cloned into the PstI/HindIII sites of pBAD HisA (Thermo Fisher Scientific). For expression  
374 of proteins in *S. cerevisiae*, each ORF was fused to an N-terminal Su9 pre-sequence from  
375 *Neurospora crassa* for targeting to the mitochondrion, and to a C-terminal GFP tag for  
376 visualization by fluorescent microscopy. Kat-HpaII-CM and Kat-HpaII were cloned into the  
377 BamHI/KpnI sites of pYX223-mtGFP and pYES-mtGFP plasmids, respectively [31]. All plasmid  
378 constructs are detailed in **Table S2**.

### 379 ***E. coli* transformation and proliferation assays of strains expressing components of the RM** 380 **system**

381 Plasmids containing putative methyltransferase and endonuclease genes were transformed  
382 into chemically competent *E. coli* Top10 (*dcm+ dam+, mcrA-*) or DH5 $\alpha$  (*dcm+ dam+, mcrA+*).  
383 Where transformations into DH5 $\alpha$  were unsuccessful, biological triplicate transformations  
384 were performed into both Top10 and DH5 $\alpha$  to assess strain-specific incompatibility. This was  
385 achieved by performing transformations where equal concentrations (50 ng) of pDM040 or  
386 pACYC184 (empty vector control) were added to each competent cell aliquot, before plating  
387 onto LB Cm<sub>45</sub>, incubating at 37°C for 16 h, then counting colony forming units.

388 To assess proliferation of each *E. coli* Top10 strain, duplicate cultures were grown for  
389 16 h at 37°C (200 rpm shaking) in LB Amp<sub>50</sub> Cm<sub>45</sub> before being diluted to OD<sub>600</sub> 0.1 in the same  
390 medium. 100  $\mu$ L of each culture was inoculated into a 96-well plate and incubated at 37°C  
391 with 200 rpm double-orbital shaking in a BMG FLUOstar Omega Lite instrument. Proliferation  
392 was assessed by measuring OD<sub>595</sub> at 5-minute intervals for 480 minutes.

### 393 **Bisulfite conversion to assess for methylase activity**

394 To assay for 5-methylcytosine (5-mC) methyltransferase activity, *E. coli* Top10 strains with a  
395 pACYC184 vector containing Kat-HpaII-CM (pDM040), Kat-MutH-CM (pDM042), or *Algibacter*  
396 methyltransferase (Alg-HpaII-CM) (pDM041) were grown for 16 h at 37°C (200 rpm shaking)  
397 in LB Cm<sub>45</sub>. Plasmids were extracted using a GeneJet Plasmid Miniprep kit (Thermo Fisher  
398 Scientific), linearised using HindIII to avoid supercoiling, then gel extracted (Promega Wizard  
399 SV Gel and PCR Clean-Up System). Linear plasmids were subjected to bisulfite conversion  
400 using the EpiMark Bisulfite Conversion Kit (New England Biolabs), following the  
401 manufacturer's instructions. A 299 bp region of each plasmid was amplified with primers  
402 pACYC184\_5mC\_F and pACYC184\_5mC\_R2 to assess CCGG methylation, and a 233 bp region  
403 was amplified with primers pACYC184\_region2\_5mC\_F2/R2 to assess GATC methylation.  
404 Both primer pairs (**Table S1**) were designed to amplify bisulfite-converted DNA. 25 µl  
405 reactions containing 1x GoTaq G2 Hot Start Green Master Mix (Promega), 1 µM each primer  
406 and 1 µL of 100-fold diluted plasmid template were used, with the following cycling  
407 conditions: 2 mins at 94°C, followed by 35 cycles of 15 s at 94°C, 30 s at 50°C and 30 s at 72°C,  
408 then a final extension of 5 mins at 72°C. PCR products were then purified (Promega Wizard  
409 SV Gel and PCR Clean-Up System) and sequenced on both strands (Eurofins Genomics) to  
410 identify bases which remained as cytosines, indicative of a 5-mC modification at this site.

411 To assess mtDNA methylation in *S. cerevisiae* cells, 1 mL of culture was purified using  
412 a Promega Wizard genomic DNA purification kit, following the manufacturer's instructions for  
413 isolating genomic DNA from yeast. Bisulfite conversion was performed as above, with 500 ng  
414 of genomic DNA used in each reaction. Primers cox1\_bisulfite\_F and cox1\_bisulfite\_R (**Table**  
415 **S1**) were then used to amplify a 443 bp region of the mitochondrial *cox1* gene using GoTaq  
416 Hot Start Master Mix (Promega). Each 50 µL reaction contained 500 nM each primer and  
417 cycling conditions were as described above. PCR products were purified using a Wizard PCR  
418 clean-up kit (Promega) before sequencing (Eurofins Genomics).

#### 419 **GFP localisation of heterologously expressed RM system components in yeast using** 420 **spinning disc confocal microscopy**

421 Plasmids pDM071, encoding su9(MTS)-Kat-HpaII-GFP, or pDM072, encoding su9(MTS)-Kat-  
422 HpaII-CM-GFP (**Table S2**), were transformed into competent *S. cerevisiae* BY4742 cells, using  
423 the method described by Thompson *et al* [59], and selected on Scm-ura [0.69% yeast nitrogen



424 base without amino acids (Formedium), 770 mg L<sup>-1</sup> complete supplement mix (CSM) lacking  
425 uracil (Formedium), 2% (wt/vol) glucose, and 1.8% (wt/vol) Agar No. 2 Bacteriological  
426 (Neogen)] or Scm-his agar (containing CSM-histidine in place of CSM-uracil), respectively.  
427 Cells were grown for 16 h in Scm-his or Scm-ura plus 2% glucose at 30°C, diluted 10-fold, and  
428 induced in fresh media containing 2% galactose (instead of glucose) for 12 h. Cells were then  
429 harvested by centrifugation, and resuspended in sterile water containing 1 µg mL<sup>-1</sup> DAPI for  
430 30 min, which preferentially labels mtDNA in the absence of fixation [32]. Cells were then  
431 observed by spinning-disc confocal microscopy using an Olympus IX81 inverted microscope  
432 affixed with a CSU-X1 Spinning Disk unit (Yokogawa) and 405 nm/488 nm lasers.

### 433 **Assessment of petite formation in *S. cerevisiae***

434 A *S. cerevisiae* W303 derivative, CAY169 [60] harbouring plasmid pDM071 (Hpall) was grown  
435 to mid-logarithmic phase in Scm-ura [0.69% yeast nitrogen base without amino acids  
436 (Formedium), 770 mg L<sup>-1</sup> complete supplement mix lacking uracil (Formedium), 2% (wt/vol)  
437 glucose, 20 mg L<sup>-1</sup> adenine sulfate]. Cells were pelleted and re-suspended in fresh media  
438 containing 2% galactose (instead of glucose) for 12 h to induce expression of su9(MTS)-Kat-  
439 Hpall-GFP, then plated on Scm-ura agar (as above, containing glucose as the sole carbon  
440 source). Plates were incubated for 3 days at 30°C and imaged to assess the formation of petite  
441 colonies following the pulse of mitochondrial Kat-Hpall expression.

### 442 **Data Release Statement**

443 The single-cell amplified genome assemblies and the K1, K3 and K4 mitochondrial genome  
444 contigs, originally from Wideman *et al.*, 2020, are available at  
445 <https://doi.org/10.6084/m9.figshare.7352966> and  
446 <https://doi.org/10.6084/m9.figshare.7314728>, respectively. All additional relevant data are  
447 within the paper and its Supporting Information files.

### 448 **Acknowledgements**

449 The authors would like to thank Dayana Salas-Leiva for helpful advice about meiosis and  
450 Alexandra Worden's Group for assistance in provision of samples for the initial study  
451 (Wideman *et al.* 2020). pYX223-mtGFP and pYES-mtGFP were a gift from Benedikt  
452 Westermann (Addgene plasmid # 45051/45053). The Wissenschaftskolleg zu Berlin provided



453 accommodation for a joint lab meeting at which this project was devised. EMBO provided  
454 travel arrangements enabling the joint lab meeting to occur. C.D.D. is supported by the Sigrid  
455 Juselius Foundation, the Academy of Finland (331556), and the Jane and Aatos Erkko  
456 Foundation. T.A.R. is supported by a Royal Society University Research Fellowship (UF130382)  
457 and additional awards through the EMBO YIP program. C.W.S is supported by a  
458 Vetenskapsrådet starting grant (2020-05071).

## 459 **References**

- 460 1. Bonen L, Doolittle WF. On the prokaryotic nature of red algal chloroplasts. Proceedings of  
461 the National Academy of Sciences. 1975;72: 2310–2314. doi:10.1073/pnas.72.6.2310
- 462 2. Gray MW, Doolittle WF. Has the endosymbiont hypothesis been proven? Microbiol Rev.  
463 1982;46: 1–42.
- 464 3. Gray MW. The Bacterial Ancestry of Plastids and Mitochondria. BioScience. 1983;33: 693–  
465 699. doi:10.2307/1309349
- 466 4. Gabaldón T, Huynen MA. From Endosymbiont to Host-Controlled Organelle: The Hijacking  
467 of Mitochondrial Protein Synthesis and Metabolism. PLOS Computational Biology.  
468 2007;3: e219. doi:10.1371/journal.pcbi.0030219
- 469 5. Burger G, Gray MW, Lang BF. Mitochondrial genomes: anything goes. Trends in Genetics.  
470 2003;19: 709–716. doi:10.1016/j.tig.2003.10.012
- 471 6. Green BR. Chloroplast genomes of photosynthetic eukaryotes. The Plant Journal. 2011;66:  
472 34–44. doi:<https://doi.org/10.1111/j.1365-3113X.2011.04541.x>
- 473 7. Adams KL, Palmer JD. Evolution of mitochondrial gene content: gene loss and transfer to  
474 the nucleus. Molecular Phylogenetics and Evolution. 2003;29: 380–395.  
475 doi:10.1016/S1055-7903(03)00194-5
- 476 8. Johnston IG, Williams BP. Evolutionary Inference across Eukaryotes Identifies Specific  
477 Pressures Favoring Mitochondrial Gene Retention. Cell Syst. 2016;2: 101–111.  
478 doi:10.1016/j.cels.2016.01.013
- 479 9. Rice DW, Alverson AJ, Richardson AO, Young GJ, Sanchez-Puerta M V., Munzinger J, et al.  
480 Horizontal Transfer of Entire Genomes via Mitochondrial Fusion in the Angiosperm  
481 Amborella. Science. 2013;342: 1468–1473. doi:10.1126/science.1246275
- 482 10. Goremykin V V., Salamini F, Velasco R, Viola R. Mitochondrial DNA of *Vitis vinifera* and the  
483 issue of rampant horizontal gene transfer. Molecular Biology and Evolution. 2009.  
484 doi:10.1093/molbev/msn226

- 485 11. Mower JP, Stefanović S, Hao W, Gummow JS, Jain K, Ahmed D, et al. Horizontal acquisition  
486 of multiple mitochondrial genes from a parasitic plant followed by gene conversion with  
487 host mitochondrial genes. *BMC Biology*. 2010. doi:10.1186/1741-7007-8-150
- 488 12. Hao W, Richardson AO, Zheng Y, Palmer JD. Gorgeous mosaic of mitochondrial genes  
489 created by horizontal transfer and gene conversion. *PNAS*. 2010;107: 21576–21581.  
490 doi:10.1073/pnas.1016295107
- 491 13. Stegemann S, Bock R. Exchange of Genetic Material Between Cells in Plant Tissue Grafts.  
492 *Science*. 2009;324: 649–651. doi:10.1126/science.1170397
- 493 14. Gurdon C, Svab Z, Feng Y, Kumar D, Maliga P. Cell-to-cell movement of mitochondria in  
494 plants. *Proc Natl Acad Sci USA*. 2016;113: 3395–3400. doi:10.1073/pnas.1518644113
- 495 15. Hertle AP, Haberl B, Bock R. Horizontal genome transfer by cell-to-cell travel of whole  
496 organelles. *Sci Adv*. 2021;7: eabd8215. doi:10.1126/sciadv.abd8215
- 497 16. Hausner G. Introns, Mobile Elements, and Plasmids. *Organelle Genetics: Evolution of*  
498 *Organelle Genomes and Gene Expression*. 2012. pp. 329–357. doi:10.1007/978-3-642-  
499 22380-8\_13
- 500 17. Wu B, Hao W. Horizontal Transfer and Gene Conversion as an Important Driving Force in  
501 Shaping the Landscape of Mitochondrial Introns. *G3 (Bethesda)*. 2014;4: 605–612.  
502 doi:10.1534/g3.113.009910
- 503 18. Martin W, Herrmann RG. Gene Transfer from Organelles to the Nucleus: How Much, What  
504 Happens, and Why? *Plant Physiology*. 1998;118: 9–17. doi:10.1104/pp.118.1.9
- 505 19. Yurchenko T, Ševčíková T, Strnad H, Butenko A, Eliáš M. The plastid genome of some  
506 eustigmatophyte algae harbours a bacteria-derived six-gene cluster for biosynthesis of  
507 a novel secondary metabolite. *Open Biol*. 2016;6. doi:10.1098/rsob.160249
- 508 20. Bravo Núñez MA, Nuckolls NL, Zanders SE. Genetic Villains: Killer Meiotic Drivers. *Trends*  
509 *Genet*. 2018;34: 424–433. doi:10.1016/j.tig.2018.02.003
- 510 21. Werren JH. Selfish genetic elements, genetic conflict, and evolutionary innovation. *PNAS*.  
511 2011;108: 10863–10870. doi:10.1073/pnas.1102343108
- 512 22. Vasu K, Nagaraja V. Diverse Functions of Restriction-Modification Systems in Addition to  
513 Cellular Defense. *Microbiol Mol Biol Rev*. 2013;77: 53–72. doi:10.1128/MMBR.00044-12
- 514 23. Mruk I, Kobayashi I. To be or not to be: regulation of restriction–modification systems and  
515 other toxin–antitoxin systems. *Nucleic Acids Res*. 2014;42: 70–86.  
516 doi:10.1093/nar/gkt711
- 517 24. Wideman JG, Monier A, Rodríguez-Martínez R, Leonard G, Cook E, Poirier C, et al.  
518 Unexpected mitochondrial genome diversity revealed by targeted single-cell genomics

- 519 of heterotrophic flagellated protists. *Nature Microbiology*. 2020;5: 154–165.  
520 doi:10.1038/s41564-019-0605-4
- 521 25. Nishimura Y, Kume K, Sonehara K, Tanifuji G, Shiratori T, Ishida K, et al. Mitochondrial  
522 Genomes of *Hemiarma marina* and *Leucocryptos marina* Revised the Evolution of  
523 Cytochrome c Maturation in Cryptista. *Front Ecol Evol*. 2020;8:  
524 doi:10.3389/fevo.2020.00140
- 525 26. Roger AJ, Muñoz-Gómez SA, Kamikawa R. The Origin and Diversification of Mitochondria.  
526 *Current Biology*. 2017;27: R1177–R1192. doi:10.1016/j.cub.2017.09.015
- 527 27. Fan L, Wu D, Goremykin V, Xiao J, Xu Y, Garg S, et al. Phylogenetic analyses with systematic  
528 taxon sampling show that mitochondria branch within Alphaproteobacteria. *Nature*  
529 *Ecology & Evolution*. 2020;4: 1213–1219. doi:10.1038/s41559-020-1239-x
- 530 28. Buryanov YI, Bogdarina IG, Bayev AA. Site specificity and chromatographic properties of  
531 *E. coli* K12 and EcoRII DNA-cytosine methylases. *FEBS LETTERS*. 1978;88: 4.
- 532 29. Geier GE, Modrich P. Recognition sequence of the dam methylase of *Escherichia coli* K12  
533 and mode of cleavage of Dpn I endonuclease. *J Biol Chem*. 1979;254: 1408–1413.
- 534 30. Raleigh EA, Trimarchi R, Revel H. Genetic and Physical Mapping of the Mcra (RglA) and  
535 Mcrb (RglB) Loci of *Escherichia coli* K-12. *Genetics*. 1989;122: 279–296.
- 536 31. Westermann B, Neupert W. Mitochondria-targeted green fluorescent proteins:  
537 convenient tools for the study of organelle biogenesis in *Saccharomyces cerevisiae*.  
538 *Yeast*. 2000;16: 1421–1427. doi:[https://doi.org/10.1002/1097-](https://doi.org/10.1002/1097-0061(200011)16:15<1421::AID-YEA624>3.0.CO;2-U)  
539 [0061\(200011\)16:15<1421::AID-YEA624>3.0.CO;2-U](https://doi.org/10.1002/1097-0061(200011)16:15<1421::AID-YEA624>3.0.CO;2-U)
- 540 32. Williamson DH, Fennell DJ. [62] Visualization of yeast mitochondrial DNA with the  
541 fluorescent stain “DAPI.” *Methods in Enzymology*. Academic Press; 1979. pp. 728–733.  
542 doi:10.1016/0076-6879(79)56065-0
- 543 33. Kobayashi I. Behavior of restriction-modification systems as selfish mobile elements and  
544 their impact on genome evolution. *Nucleic acids research*. 2001;29: 3742–56.
- 545 34. Hillman BI, Cai G. The Family Narnaviridae: Simplest of RNA Viruses. In: Ghabrial SA,  
546 editor. *Advances in Virus Research*. Academic Press; 2013. pp. 149–176.  
547 doi:10.1016/B978-0-12-394315-6.00006-4
- 548 35. Nishimura Y, Shiratori T, Ishida K, Hashimoto T, Ohkuma M, Inagaki Y. Horizontally-  
549 acquired genetic elements in the mitochondrial genome of a centrohelid *Marophrys* sp.  
550 SRT127. *Scientific Reports*. 2019;9: 4850. doi:10.1038/s41598-019-41238-6
- 551 36. Fitcher B, Reid E, Hickey DA. Maintenance of the 2 micron circle plasmid of  
552 *Saccharomyces cerevisiae* by sexual transmission: an example of a selfish DNA. *Genetics*.  
553 1988;118: 411–415.

- 554 37. Zeyl C, Bell G, Green DM. Sex and the Spread of Retrotransposon Ty3 in Experimental  
555 Populations of *Saccharomyces Cerevisiae*. *Genetics*. 1996;143: 1567–1577.
- 556 38. Goddard MR, Godfray HCJ, Burt A. Sex increases the efficacy of natural selection in  
557 experimental yeast populations. *Nature*. 2005;434: 636–640. doi:10.1038/nature03405
- 558 39. Harrison E, MacLean RC, Koufopanou V, Burt A. Sex drives intracellular conflict in yeast.  
559 *Journal of Evolutionary Biology*. 2014;27: 1757–1763.  
560 doi:<https://doi.org/10.1111/jeb.12408>
- 561 40. Kawano S, Takano H, Kuroiwa T. Sexuality of Mitochondria: Fusion, Recombination, and  
562 Plasmids. In: Jeon KW, Jarvik J, editors. *International Review of Cytology*. Academic  
563 Press; 1995. pp. 49–110. doi:10.1016/S0074-7696(08)62496-1
- 564 41. Logan DC. The dynamic plant chondriome. *Seminars in Cell & Developmental Biology*.  
565 2010;21: 550–557. doi:10.1016/j.semcd.2009.12.010
- 566 42. Schurko AM, Logsdon JM. Using a meiosis detection toolkit to investigate ancient asexual  
567 “scandals” and the evolution of sex. *BioEssays*. 2008;30: 579–589.  
568 doi:<https://doi.org/10.1002/bies.20764>
- 569 43. Speijer D, Lukeš J, Eliáš M. Sex is a ubiquitous, ancient, and inherent attribute of  
570 eukaryotic life. *Proc Natl Acad Sci U S A*. 2015;112: 8827–8834.  
571 doi:10.1073/pnas.1501725112
- 572 44. Birky CW. Uniparental inheritance of mitochondrial and chloroplast genes: mechanisms  
573 and evolution. *Proceedings of the National Academy of Sciences*. 1995;92: 11331–  
574 11338. doi:10.1073/pnas.92.25.11331
- 575 45. Sager R, Lane D. Molecular Basis of Maternal Inheritance. *Proceedings of the National*  
576 *Academy of Sciences*. 1972;69: 2410–2413. doi:10.1073/pnas.69.9.2410
- 577 46. Nishimura Y. An mt+ gamete-specific nuclease that targets mt- chloroplasts during sexual  
578 reproduction in *C. reinhardtii*. *Genes & Development*. 2002;16: 1116–1128.  
579 doi:10.1101/gad.979902
- 580 47. Havird JC, Forsythe ES, Williams AM, Werren JH, Dowling DK, Sloan DB. Selfish  
581 Mitonuclear Conflict. *Current Biology*. 2019;29: R496–R511.  
582 doi:10.1016/j.cub.2019.03.020
- 583 48. Edgar RC. MUSCLE: multiple sequence alignment with high accuracy and high throughput.  
584 *Nucleic Acids Research*. 2004;32: 1792–1797. doi:10.1093/nar/gkh340
- 585 49. Maddison WP, Maddison DR. Mesquite 2.75: a modular system for evolutionary analysis.  
586 2011.

- 587 50. Ronquist F, Teslenko M, van der Mark P, Ayres DL, Darling A, Höhna S, et al. MrBayes 3.2:  
588 Efficient Bayesian Phylogenetic Inference and Model Choice Across a Large Model Space.  
589 Systematic Biology. 2012;61: 539–542. doi:10.1093/sysbio/sys029
- 590 51. Stamatakis A. RAxML version 8: a tool for phylogenetic analysis and post-analysis of large  
591 phylogenies. Bioinformatics. 2014;30: 1312–1313. doi:10.1093/bioinformatics/btu033
- 592 52. Le SQ, Gascuel O. An Improved General Amino Acid Replacement Matrix. Molecular  
593 Biology and Evolution. 2008;25: 1307–1320. doi:10.1093/molbev/msn067
- 594 53. Stothard P. The Sequence Manipulation Suite: JavaScript Programs for Analyzing and  
595 Formatting Protein and DNA Sequences. BioTechniques. 2000;28: 1102–1104.  
596 doi:10.2144/00286ir01
- 597 54. R Core Team. R: A language and environment for statistical computing. R Foundation for  
598 Statistical Computing, Vienna, Austria. 2013. Available: <http://www.R-project.org/>.
- 599 55. Villar E, Vannier T, Vernet C, Lescot M, Cuenca M, Alexandre A, et al. The Ocean Gene  
600 Atlas: exploring the biogeography of plankton genes online. Nucleic Acids Research.  
601 2018;46: W289–W295. doi:10.1093/nar/gky376
- 602 56. Malik S-B, Pightling AW, Stefaniak LM, Schurko AM, Jr JML. An Expanded Inventory of  
603 Conserved Meiotic Genes Provides Evidence for Sex in *Trichomonas vaginalis*. PLOS ONE.  
604 2008;3: e2879. doi:10.1371/journal.pone.0002879
- 605 57. Hofstatter PG, Lahr DJG. All Eukaryotes Are Sexual, unless Proven Otherwise. BioEssays.  
606 2019;41: 1800246. doi:<https://doi.org/10.1002/bies.201800246>
- 607 58. Altschul SF, Gish W, Miller W, Myers EW, Lipman DJ. Basic local alignment search tool.  
608 Journal of Molecular Biology. 1990;215: 403–410. doi:10.1016/S0022-2836(05)80360-2
- 609 59. Thompson JR, Register E, Curotto J, Kurtz M, Kelly R. An improved protocol for the  
610 preparation of yeast cells for transformation by electroporation. Yeast. 1998;14: 565–  
611 571. doi:[https://doi.org/10.1002/\(SICI\)1097-0061\(19980430\)14:6<565::AID-  
612 YEA251>3.0.CO;2-B](https://doi.org/10.1002/(SICI)1097-0061(19980430)14:6<565::AID-YEA251>3.0.CO;2-B)
- 613 60. Milner DS, Attah V, Cook E, Maguire F, Savory FR, Morrison M, et al. Environment-  
614 dependent fitness gains can be driven by horizontal gene transfer of transporter-  
615 encoding genes. PNAS. 2019;116: 5613–5622. doi:10.1073/pnas.1815994116
- 616 61. Gilchrist CLM, Chooi Y-H. clinker & clustermap.js: Automatic generation of gene cluster  
617 comparison figures. bioRxiv. 2020 [cited 19 Nov 2020]. doi:10.1101/2020.11.08.370650
- 618 62. Kumar S, Jones M, Koutsovoulos G, Clarke M, Blaxter M. Blobology: exploring raw genome  
619 data for contaminants, symbionts and parasites using taxon-annotated GC-coverage  
620 plots. Frontiers in Genetics. 2013;4: 237. doi:10.3389/fgene.2013.00237

621





627 **Figure 2**

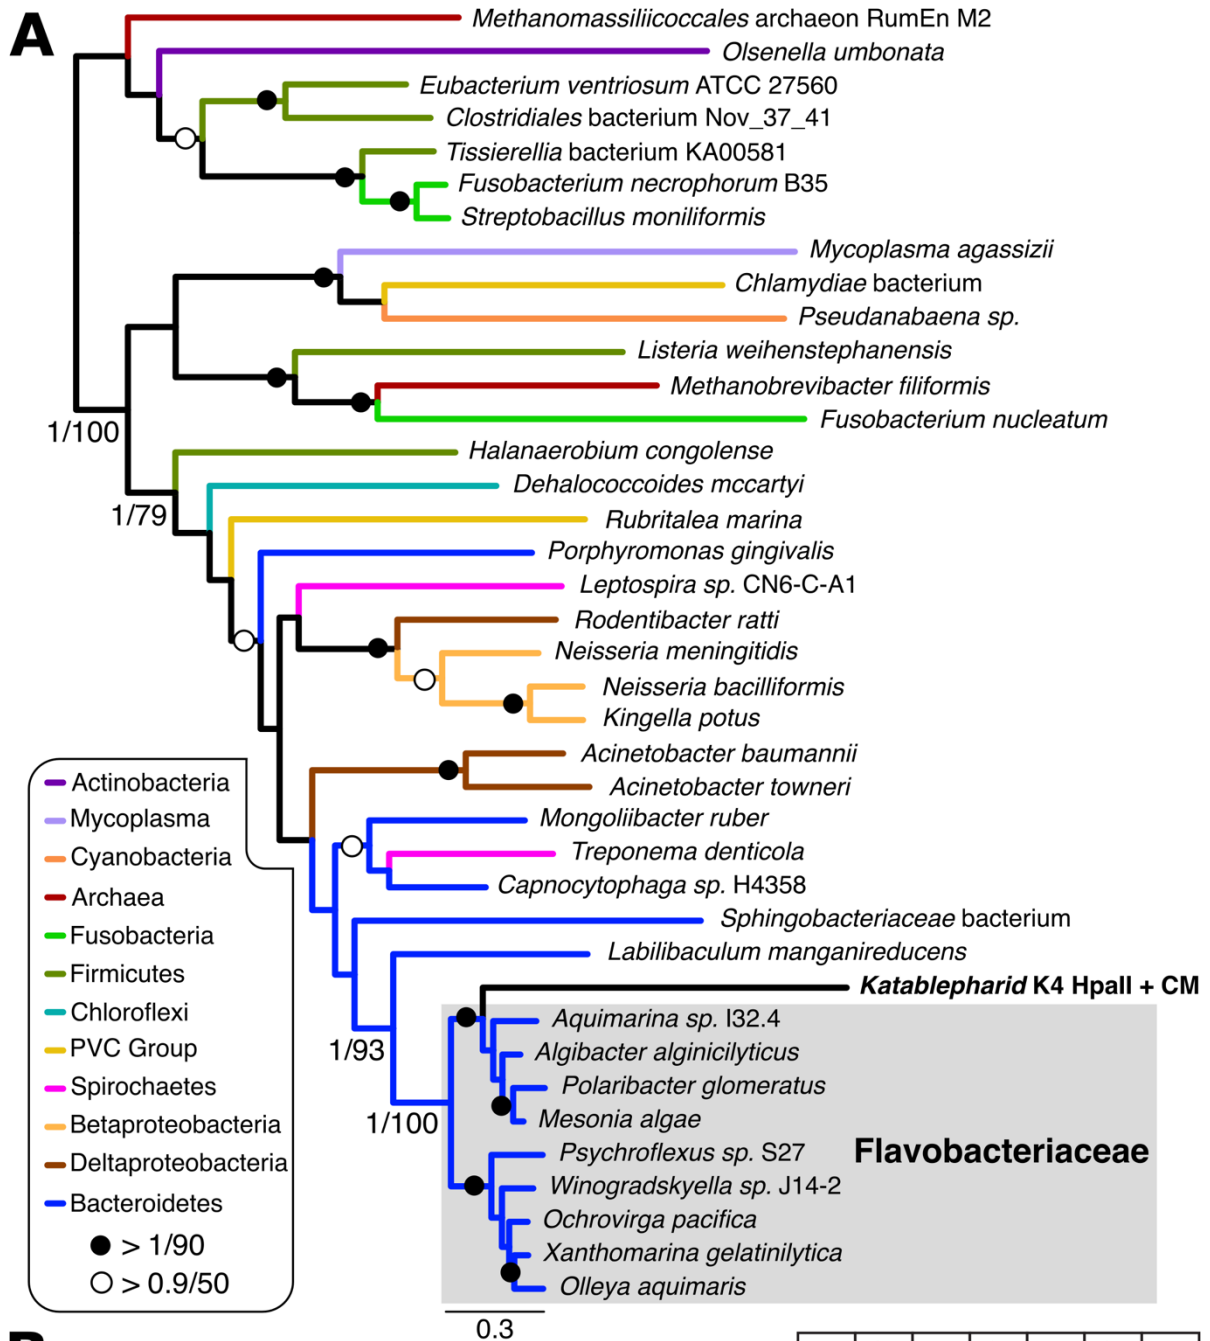

**B**

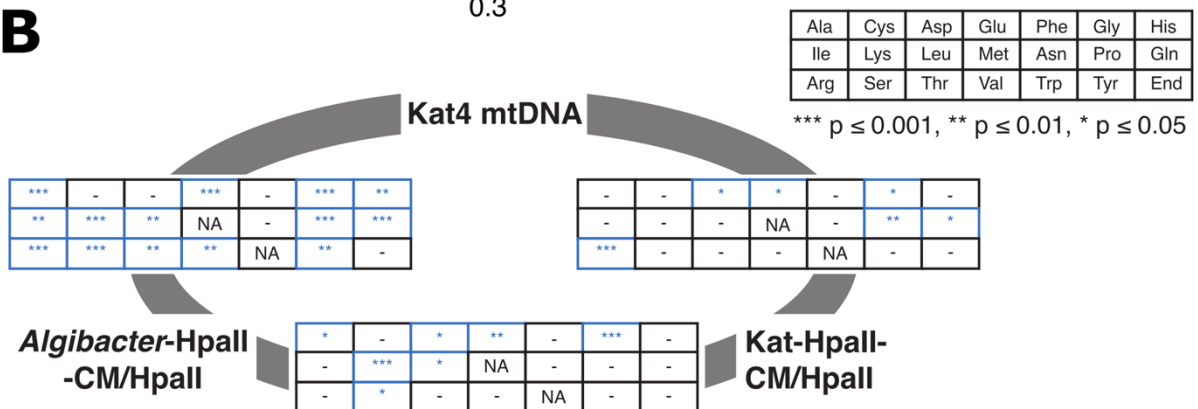

629 **Figure 3**  
630

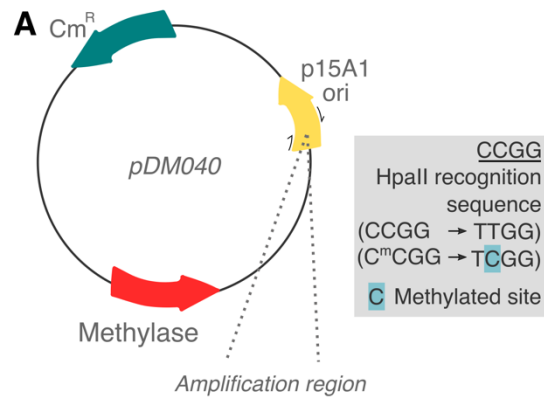

TATCAGGTGTTTTTCTGGTGGTTTTTGTGTTT  
TTTTGTTTTGTTTTTGGTTATCGGTGTTATTTGT  
TGTTATGGTTGTGTTTGTGTTTATTTATGTTTGATATT  
AGTTTCGGGTAGGTAGTTTGTGTTTAAGTTGGATTGTA  
TGTATGAATTTTTGTTAGTTTGATTGTTGTGTTTTA  
TTCGGTAATTATTGTTTTGAGTTAATTCCGA

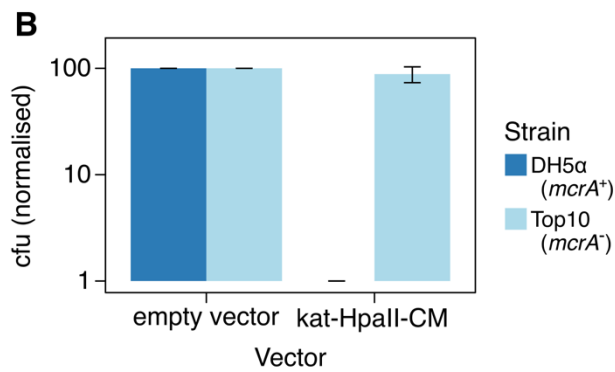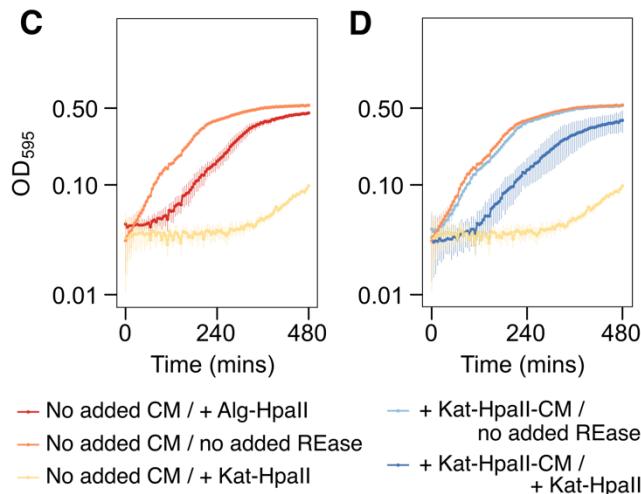

631  
632



633 **Figure 4**

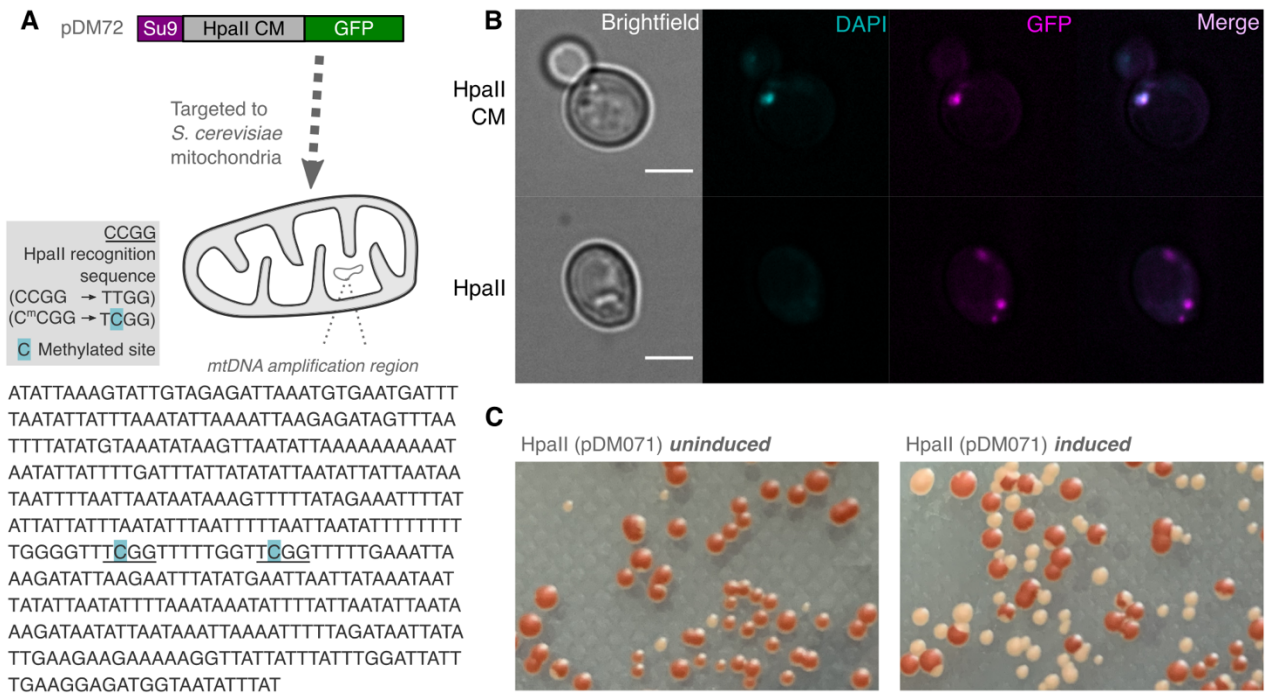

634

635

636 **Figure legends**

637

638 **Fig. 1. The katablepharid K1 and K4 mitochondrial genomes encode two tandemly encoded**

639 **restriction modification systems. A.** The K4 mitochondrial genome encodes six ORFs (orange)

640 with homologues in *L. marina* but with no similarity to any other eukaryote. Five ORFs are

641 found in K4 but not in *L. marina* (red). These five genes include a putative GIY-YIG homing

642 endonuclease, and two putative RM systems, each consisting of an endonuclease and a

643 cytosine methyltransferase. Blue, protein coding genes; pink, RNA genes; black, introns. **B.**

644 Variation in selfish elements detected in single amplified genomes and environmental DNA

645 (eDNA). PCR followed by Sanger sequencing was performed to confirm integration of selfish

646 element genes in K1, K3, and K4 single-cell amplified genomes (primer positions indicated by

647 arrows). PCR of eDNA samples identified one product with high sequence identity (99.7%) to

648 K4, and a shorter (2264 bp) unique product that is intermediate in length compared to K3 and

649 K4. Red lines represent meta-transcriptome hits (95-100% identity) identified from the

650 MATOU transcriptome database. Gene name abbreviations: *atp9*, ATP synthase 9 subunit; *W*,

651 tryptophan tRNA; *HpaII*, HpaII endonuclease; *CM*, cytosine methylase; *MutH*, MutH

652 endonuclease; *rns*, small subunit rRNA gene. Fig. 1B was generated using Clinker [61] and

653 modified by hand.

654 **Fig. 2. Phylogenetic reconstruction of concatenated genes encoded by katablepharid**

655 **restriction-modification selfish elements, and comparison of codon frequencies between**

656 **katablepharid and *Algibacter* complements. A.** A concatenated phylogeny was

657 reconstructed using sequences from K4 and 38 prokaryotic species containing tandemly

658 encoded HpaII-CM and HpaII proteins. The concatenation resulted in an alignment length of

659 767 amino acid positions. Support values are posterior probabilities calculated using MrBayes

660 v3.2.6 [50] and 1000 bootstrap replicates using RAxML v8.2.10 [51] and reported as

661 MrBayes/RAxML. The MrBayes topology is shown. Species phyla are indicated as differently

662 coloured branches as depicted inset. For individual trees of HpaII and HpaII-CM, see **Fig. S1.**

663 **B.** Pairwise comparisons of sets of alternative codon frequencies for Kat4-HpaII-CM/HpaII,

664 *Algibacter*-HpaII-CM/HpaII and the conserved protein-coding gene repertoire of the Kat4

665 mtDNA. Pairwise comparisons are shown in a grid. The key shows a grid with the

666 corresponding amino acids. Results for Fisher exact tests comparing codon usage for each

667 amino acid are shown in tables between each pair. Asterisks denote significantly different  
668 codon usage, ‘-’ indicates no significant difference in codon frequencies, and ‘NA’ indicates  
669 methionine and tryptophan, which were not tested as these amino acids are encoded by a  
670 single codon. Grids are placed on a grey circle between the three compared gene sets to  
671 identify the results of each pairwise comparison. Raw data available in **Supplementary File**  
672 **S3**.

673

674 **Fig. 3. Heterologously expressed katablepharid HpaII-CM and HpaII are catalytically active.**

675 **A.** Bisulfite conversion to identify 5-methylcytosine modification by the katablepharid HpaII-  
676 CM. Schematic of bisulfite conversion protocol to assess 5-methylcytosine modifications.  
677 Plasmids were purified from *E. coli* Top10 and subjected to bisulfite conversion to convert  
678 cytosine to uracil (replaced with thymine during PCR), while 5-methylcytosines (5-mC) remain  
679 unaffected. 5-mC residues were detected within the amplification region when the  
680 katablepharid HpaII-CM was present on plasmid pDM040. Notably, each methylated site  
681 (indicated in blue) was located at CCGG, an HpaII recognition sequence (underlined). **B.**  
682 Transformation efficiency of *E. coli* strains when transformed with putative katablepharid  
683 HpaII-CM. Transformation efficiency of *E. coli* DH5 $\alpha$  and Top10 strains when transformed with  
684 empty vector control (pACYC184) or vector containing the katablepharid putative  
685 methyltransferase coding sequence (pDM40). Experiments were performed from a minimum  
686 of three independent competent cell batches, and colony forming units (cfu) were  
687 enumerated and normalised to the positive control (pACYC184) within each batch. These data  
688 demonstrate that the katablepharid HpaII methyltransferase is toxic in *E. coli* DH5 $\alpha$  (*mcrA*+),  
689 but not in Top10 (*mcrA*-). Error bars represent one standard deviation from the mean. **C.**  
690 Growth of *E. coli* Top10 cells with combinations of plasmids containing putative katablepharid  
691 methyltransferase (CM+), katablepharid HpaII (*Kat* HpaII) and *Algibacter* HpaII (*Alg* HpaII)  
692 genes, or the corresponding empty vectors (‘no added CM’ or ‘no added REase’ [restriction  
693 endonuclease]) . Duplicate cultures were grown for 8 h under Amp/Cm selection, induced  
694 with 0.0004% arabinose, at 37°C and growth was assessed by measuring OD<sub>595</sub> at 5-minute  
695 intervals. The strain lacking the endonuclease showed typical *E. coli* growth, while addition of  
696 either the *Algibacter* (*Alg*) endonuclease or *Katablepharid* (*Kat*) endonuclease to the strain

697 lacking the methyltransferase caused toxicity. **D.** Addition of the katablepharid  
698 methyltransferase (CM+) rescued this toxicity to near control levels of growth (controls  
699 transposed from **C**). Error bars represent one standard deviation from the mean.

700

701 **Fig. 4. Katablepharid HpaII endonuclease and methyltransferase induce petite mutants in**  
702 ***S. cerevisiae*. A.** Bisulfite conversion to confirm targeting of a functional HpaII-CM to yeast  
703 mitochondria. Schematic of bisulfite conversion protocol to assess 5-methylcytosine  
704 modifications after induction of the katablepharid HpaII-CM from plasmid pDM072. 5-mC  
705 residues were detected within the amplification region of the *cox1* gene. Each methylated  
706 site (indicated in blue) was located at the HpaII recognition sequence (underlined). **B.**  
707 Evaluation of fluorescence for GFP-tagged HpaII-CM and HpaII, in conjunction with DAPI-  
708 labelled mtDNA. The HpaII-CM showed co-localisation with DAPI, while HpaII showed an  
709 absence of a DAPI focus, indicative of a lack of mtDNA, that is likely to be a product of  
710 endonuclease function and DNA degradation. Scale bar = 3  $\mu$ m. **C.** HpaII expression causes  
711 petite formation. Formation of petite colonies (white) after the induction of HpaII (right), in  
712 comparison to an uninduced strain (left).

713 **Supplementary figures**

714 **Figure S1. Phylogenetic reconstruction of HpaII (A) and HpaII-CM (B) encoded by katablepharid mitochondrial genome.** Phylogenies were  
 715 reconstructed using sequences from K4 and 38 prokaryotic species containing tandemly encoded HpaII and HpaII-CM proteins, resulting in  
 716 alignments of 352 and 415 positions, respectively. Support values are posterior probabilities calculated using MrBayes v3.2.6 [50] and 1000  
 717 bootstrap replicates using RAxML v8.2.10 [51] and reported as MrBayes/RAxML. The MrBayes topology is shown.  
 718

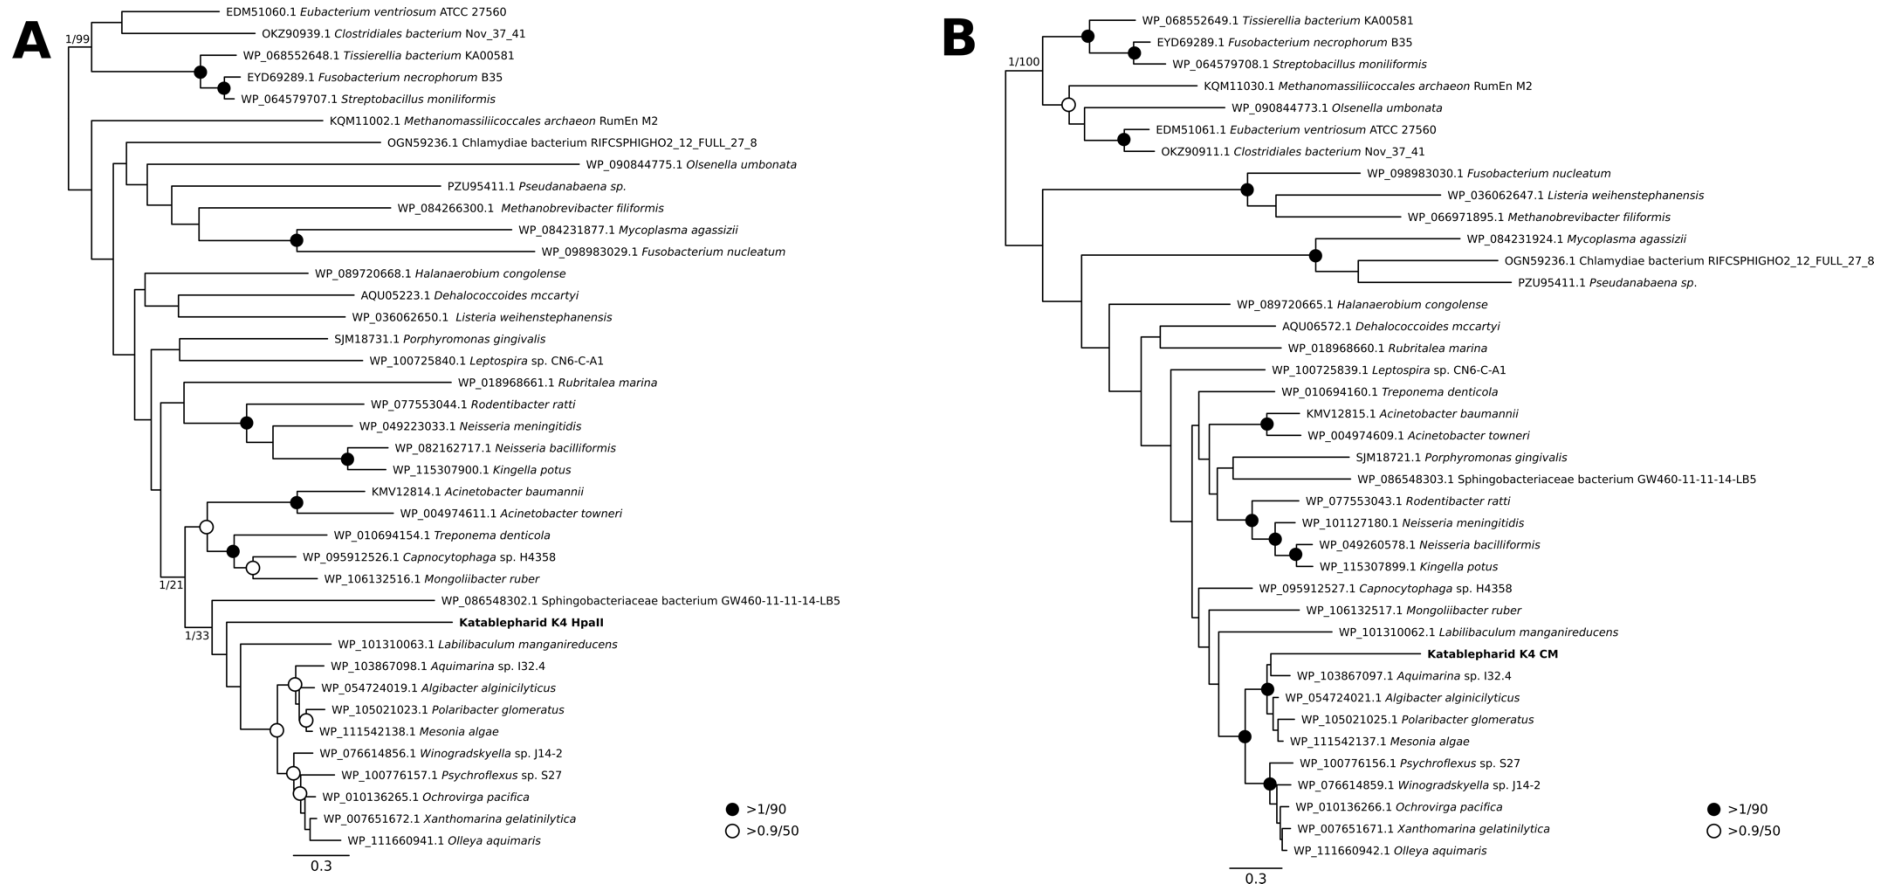

719

720

721 **Figure S2.** Katablepharid single amplified genomes contain no strong signal for bacterial contaminants. The contigs assigned to bacteria were  
 722 low; as such, we have shown assignment only at the taxonomic level of 'Bacteria' and have not shown lower taxonomic divisions. Blob-plots  
 723 were generated using BLOOTOOLS [62] for the three SAGs (K4, K1, and K3) that mapped to katablepharids using contigs >1000 bp. None of the  
 724 contigs with best BLAST hits to bacteria were related to flavobacterial sequences.  
 725

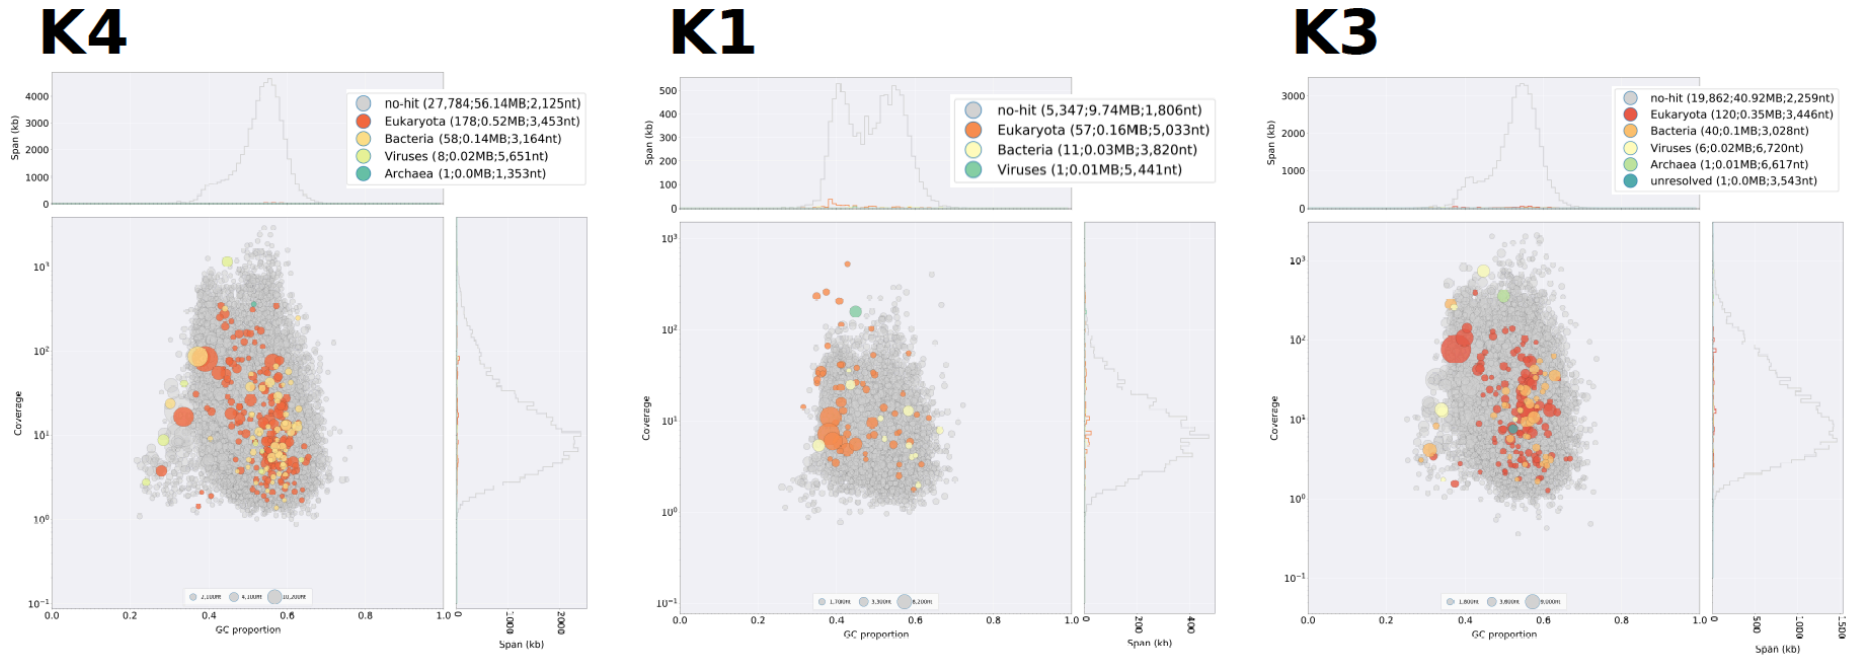

726

727 **Figure S3. Growth assay of *E. coli* Top10 expressing putative katablepharid MutH-like endonuclease.** Growth of *E. coli* Top10 cells with plasmid  
728 containing putative MutH-like endonuclease (MutH) genes, or the corresponding empty vector. Triplicate cultures were grown at 37°C for 8 h  
729 under Amp/Cm selection, induced with 0.1% arabinose, and growth was assessed by measuring OD<sub>595</sub> at 5-minute intervals. This demonstrates  
730 that addition of the MutH-like endonuclease does not cause *E. coli* toxicity. Error bars represent 1 standard deviation from the mean.

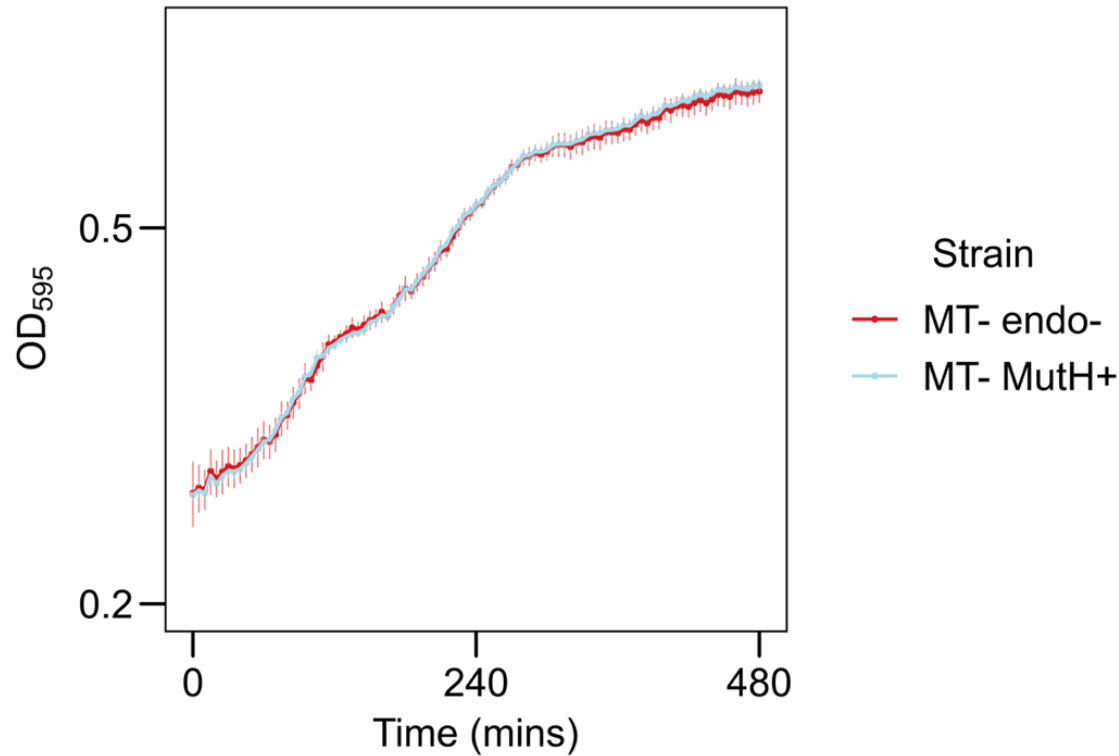

731

732 **Figure S4.** Perturbation of HpaII rescue by the katablepharid HpaII-CM after modifying the endonuclease constructs. Removal of the start codon  
733 of the ORF from the endonuclease pBAD expression vectors (leaving only the start codon encoded by the vector) resulted in the katablepharid  
734 HpaII-CM no longer offering protection against the katablepharid HpaII endonuclease (Kat HpaII) (**A**). However, the katablepharid HpaII-CM was  
735 still able to protect against the *Algibacter* HpaII endonuclease (Alg HpaII) (**B**), these results point towards a necessary concentration/function  
736 minimum requirement for rescue of katablepharid HpaII endonuclease.

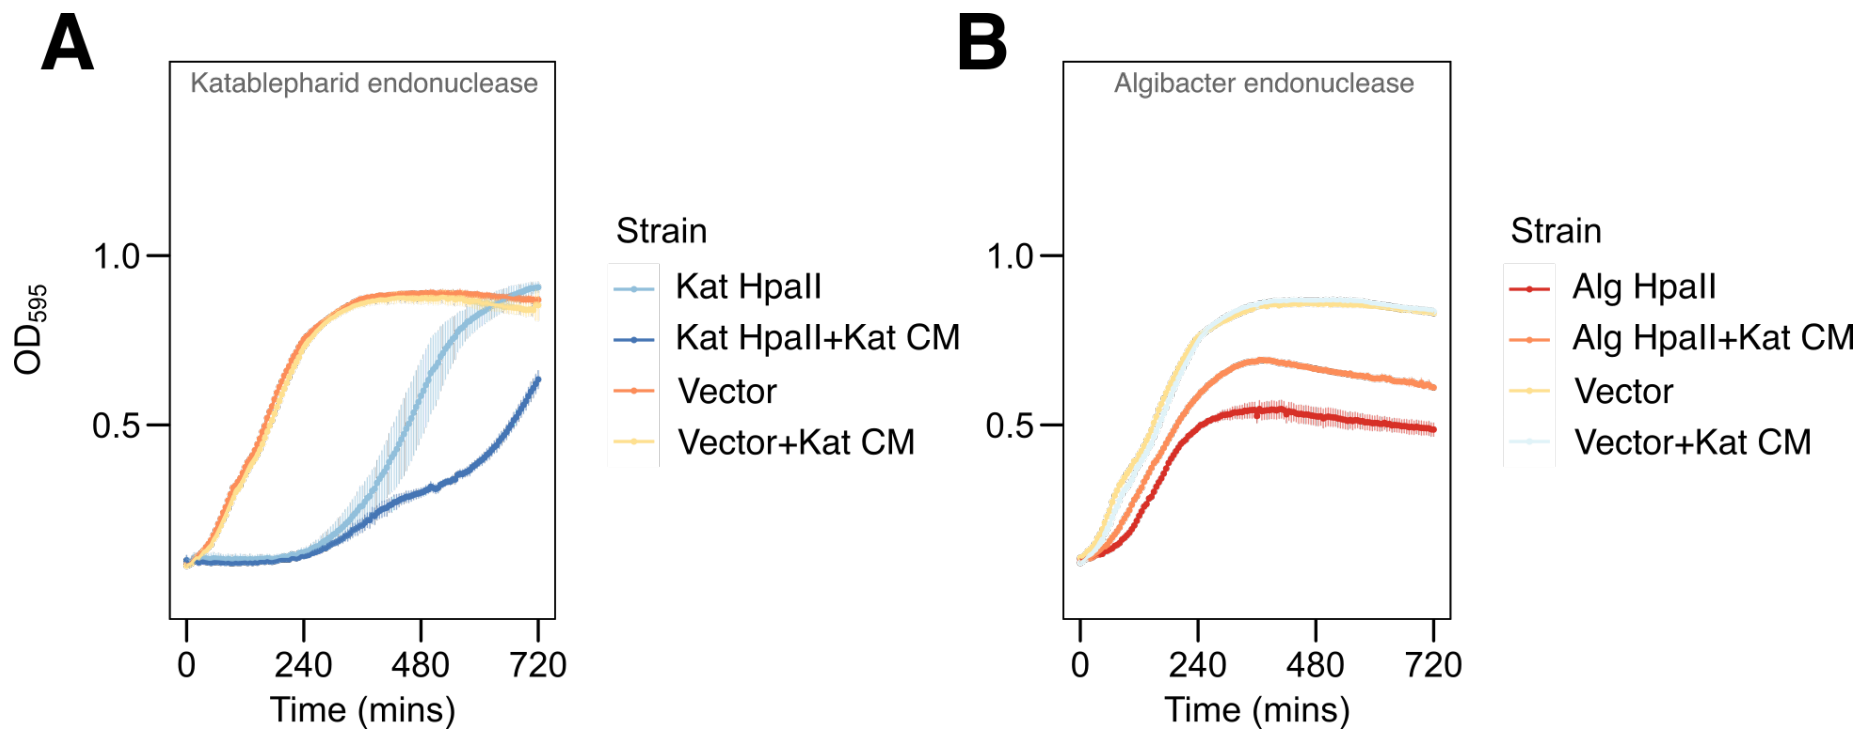



739 **Table S1: Primers used in this study**

| Primer                  | Sequence (5'- 3')              | Role                                                                                 |
|-------------------------|--------------------------------|--------------------------------------------------------------------------------------|
| Atp9_F_upstream         | CGTAGAAAATCAGAGGCGGC           | Confirmation of RM selfish element in mitochondria                                   |
| Atp9_F                  | ACGTAGGAGCAGGATTAGCAA          | Confirmation of RM selfish element in mitochondria                                   |
| Kat_F_2385              | CGTTGGGATTAGTACCTCCG           | Confirmation of RM selfish element in mitochondria                                   |
| Kat_F_3745              | ACGCAAATCAGCAAGTGGTT           | Confirmation of RM selfish element in mitochondria                                   |
| Kat_R_1727              | CGAGACTACCACGCCTCATA           | Confirmation of RM selfish element in mitochondria                                   |
| Kat_R_4022              | TCACACCAACGACTAAAGCA           | Confirmation of RM selfish element in mitochondria                                   |
| rns_kat_mito_R2         | CGTCCGCCTAAAACCTTTGT           | Confirmation of RM selfish element in mitochondria                                   |
| pACYC184_5mC_F          | TAGTGGTGGTGAAATTTGATAGGATTATAA | Amplification of bisulfite-treated <i>E. coli</i> plasmid DNA (targeting CCGG sites) |
| pACYC184_5mC_R2         | CAATTACCAATAACTACTACCAATAATACT | Amplification of bisulfite-treated <i>E. coli</i> plasmid DNA (targeting CCGG sites) |
| pACYC184_region2_5mC_F2 | AAGATATGTAAAAGTATTATTGGTAGTAGT | Amplification of bisulfite-treated <i>E. coli</i> plasmid DNA (targeting GATC sites) |
| pACYC184_region2_5mC_R2 | CCTACAACATCCAAAATAACAATACCAAAA | Amplification of bisulfite-treated <i>E. coli</i> plasmid DNA (targeting GATC sites) |
| cox1_bisulfite_F        | ATATTAAAGTATTGTAGAGATTAAATGTGA | Amplification of bisulfite-treated <i>S. cerevisiae</i> <i>cox1</i> region           |
| cox1_bisulfite_R        | ATAAATATTACCATCTCCTTCAAATAATCC | Amplification of bisulfite-treated <i>S. cerevisiae</i> <i>cox1</i> region           |

740

741 **Table S2: Plasmids used in this study.** Note that all functions described are putative and constructs are codon optimised for expression in *E. coli*,  
 742 unless otherwise stated.

| Plasmid | Description                                                                                      |
|---------|--------------------------------------------------------------------------------------------------|
| pDM027  | pBAD HisA + Katablepharid HpaII endonuclease ORF                                                 |
| pDM034  | pBAD HisA + <i>Algibacter</i> HpaII endonuclease ORF                                             |
| pDM029  | pBAD HisA + Katablepharid MutH endonuclease ORF                                                  |
| pDM040  | pACYC184 + <i>Katablepharid</i> methyltransferase ORF                                            |
| pDM041  | pACYC184 + <i>Algibacter</i> methyltransferase ORF                                               |
| pDM042  | pACYC184 + Katablepharid MutH-like methyltransferase ORF                                         |
| pDM071  | pYES-mtGFP + Katablepharid HpaII endonuclease ORF ( <i>S. cerevisiae</i> codon optimised)        |
| pDM072  | pYX223-mtGFP + Katablepharid HpaII methyltransferase ORF ( <i>S. cerevisiae</i> codon optimised) |
| pDM076  | pBAD HisA + Katablepharid HpaII endonuclease ORF, with ORF start codon omitted                   |
| pDM077  | pBAD HisA + <i>Algibacter</i> HpaII endonuclease ORF, with ORF start codon omitted               |

743

744

745 **Supplementary File S1: Data from BLASTN search against the Ocean Gene Atlas.** Table of all BLASTN hits over 100 bp, with identity scores over  
746 95%. Hits highlighted in grey align with the near-identical regions that flank the HpaII/HpaII-CM RM system; as such, these align with the 5' of  
747 both *hpaII CM* and *mutH CM*, so cannot be attributed to either gene.

748

749 **Supplementary File S2: Sequence data of putative meiosis-associated genes identified in Katablepharid SAGs.** Nucleotide and amino acid  
750 sequences for putative meiosis-associated proteins. Interruptions in open reading frames strongly suggest the presences of introns. Each protein  
751 was identified using the indicated hidden Markov model (HMM) and manually investigated. For each entry, the putative nucleotide sequence  
752 that could be confidently identified with BLAST is shown. The accession number for the parent contig of each sequence is provided and can be  
753 accessed here: [https://figshare.com/articles/dataset/Single\\_Cell\\_Genomic\\_Assemblies/7352966](https://figshare.com/articles/dataset/Single_Cell_Genomic_Assemblies/7352966)

754

755 **Supplementary File S3: Codon usage frequency data for proteins encoded by the Kat4 and *Algibacter* HpaII and HpaII-CM selfish elements,**  
756 **and the ancestral Kat4 mitochondrial proteins.** Frequency of each amino acid codon for each of the Kat4-HpaII RM, the conserved protein-  
757 coding gene repertoire of the Kat4 mtDNA, and the *Algibacter*-HpaII RM. A Fisher exact test was used to compare codon usage frequencies for  
758 each pairwise comparison; p-values are displayed beneath each amino acid.
